# Supplementary material for: The shift from early to late types of ribosomes in zebrafish development involves changes at a subset of rRNA 2′-O-Me sites
Source: PubMed Central journal article supplement — RNA. 2020 Dec;26(12):1919–34. doi: 10.1261/rna.076760.120 (PMC7668251; doi:10.1261/rna.076760.120), 2020-12
Supplement: supp_076760.120_Supplemental_Figure_S9.pdf [file supp_076760.120_Supplemental_Figure_S9.pdf]

TCATAAAAAATGACTTACATTCATGTAATCTTGTATTTACATTCAGGCAGA  
TATTCGCTACCCTGCCCTTCTGCAGCATTAGGACCCTTTTAAATGTTCC  
TGCGTGCACGCTGCCATGATCCTTCATTATGCGGATGTTTGTGGGCTAGG  
AGACAGTGACAAATTTGCTTCTTTTCGTATTAGTTAAAATATCTTTTTGGT  
TTTATATTTATATACACGTTTACTTTGAAAATGTCGATAGTCTGTGCGT  
TTACCTGAAAGCAGTATCTGTAAAATAACTGACGTTGGCTGCTCACGGCC  
TCTCCCTCGTGGTCTGTAATTTTTATTTAGTTAAGCATTTTTATCGAATATG  
ACTTGATAATTTTTTAGTAAGCTTTTGAAAATGCTTGCTGCTTATAAATA  
TTGTTGTGTAGAGAACCAAAGTCCAAGAAACGGTGCGAAAGGGCAAACGC  
AGATTTCTTGTAAGTACAAGAACACTTTTTTTTTTTTTTTTTTAAAGAG  
GATTTTAGATTGATGTTAAAATATATATAAACATGCTAAATGACTGGAGA  
TTTTTTAAATAAAAATATATGATTTAAAATGTTGTTTTACTGCCTGTTATGA  
TGAATCTTTAGAGTCTCTGATTTAATCATGAAGCTCTTCACAGTGCAGTGC  
AATGCATGCAGTCTAGTCAATTTTTGATTTTTGTTGTGGCTTGAATGTAC  
CTAAATGTTCAAATAACCTTTACAGGTTGGATGGCAGGCCGTTGACGCCA  
ACTGTTGACAACCATTTATGTAAGTATTACTTTTCCAATGAAAACCTTTTT  
TCGAAGACAGCATTTTGCCCTTATGTCATGTAAAGATGAATCATTGACT  
AGAGTCTCTGATTTCTCCATGAAGCTCTTCACAGTGCAGTGAACACATGC  
AGTACTGCTTATGATGGATTTGTTTTGGCTCGAATGTTCCTAATTGTAAT  
TTTTACAGGTTGGATGAGAGAAATTTGAGGCTGGTAGACGATGCCAACAG  
TTGACGACCAATTTGTAAGAATTAATTTTTCAACCAAAGTTTCATTCCA  
AGACGGCAAATTATCTTTAGCCAATTATTGCATGTAATGATGAATCATT  
TGACTAGAGTCTCTGATTTAACTATGAAGTTCTTCACAGTGCAGTGAAC  
CATGCTGCATTGCTTACAATGGATTGATTTTTGGCTTGAATATTCCTAA  
ATAAGTTACCTTTACAGGTTGGATGGAAGAAATTTGAGGCCAGTAGATGAT  
GCCAACAGTTGACGATCAGTTGTAAGAATTACCTTTCCAATAGAAAAAA  
AAAAATTCAAAGAAAGCACATTTGCTCTTTAGCCAATTACTGCCTGTAATG  
ATGAATCATTGACTAGAGTCTCTGATTTAAGAATGAAGTTCTTCACAGT  
GCACTGAACACATGCAGTACTGTTTATGATGGATCTTGTCTTGGCTTGA  
ATATTCTTAAATGTTAAAATACCTTCTCAGGGGCTGTTTTAGAAAGGAG  
GTTAACTGAAAACCTAGAGTATTTAACCCTGAAATGAGAGAACTCTGG  
GTTTTCCGTTTCAAATGGCAGGTTTGTAAACTCGAGAAAGCAGGGTAA  
GTCAAGCCTGTTTCTGAAAGAAAGGTAACCTTAACTCAGAGTCAGTTACT  
GTGGTAACTTACTCTGTGAATCTAACCTGGTCAAAGCAGGTTTTATTCT  
CTAACTCAGAGTTTCTGTCTGTCTCCTCCCTTTTTTAAAGATGAAGCG  
GTATTTCTCGTCTTAGCCTTACGTTTCTACCCACCTATTTAATGCTCAT  
TTTGGATATGTGCATAAAAATGATTGATAGAAACGTCAAGATGCACATAA  
CTTTTTAAAATATGCATAAAAAACGTGCATAACTGAGTAGGATAAACTTT  
TATTCGATAGAAAATGTGCGCATAAACTACGATGGAAACACTTTTACTGA  
ACAAATTACAGTATGTACATTAATAAAAAGATCATGATCATATGATAATG  
AAAATGTGTGTAATGAACAAACCAGCAGGCTGAGCACACTGTAACATGT  
CTTATTGTGTTAGTCATTTCAAATGCCTTAACTGTTTCAGTATTTGTGT  
ATATTATTAATTACCTCCGAACGTCTGGTGCCTGTCAAGAGTCTCCGCGT  
CTCATGGCTTCAGACGCCCCACGTGTTTCATTGTGTTTCAGCATTGTCTT  
CTGACATTGAGGCGCAAGTACATTAATTAGGCTAAATAAAGAATTAATTG  
ACGCAGTCTTCTTACCACAGTAAATCTGTTTGTATTTGGTGCAGTT  
TAATCAGGAAGTACGATTTTTTTCTCTTTGACTCGTTGGATGGAATTTT  
ATTGCACTTTTTATGCAATATTCCAGTTTTGCACATACATTTATGTAAT  
ATATTTGGATGGAACATAGCTATTGCCATACATTTTAGTCACACACAGAA  
GAACTGTACGAGAATGGCTTGTCTTTTTTAAATAAATAAATAAATAAAT  
TCACCTTCGACATGCAGTGAACCTAGATTAATGGGATTAATTCTTTCT  
AAAAATTATTTTTAGTACTGCTTACCTTCTAAATGTTATATTAACCTCTA  
TCACTTGATCAATAAAAAAGGCAGACACACAAGTGCAGTGTAAATCATT  
TAAAATAAATAAATGTGTAATAAAGTTTTGAAAAAAAATAAACGTCACA  
AATTACATTACTTATTTTATATACCTTAAATATTTAAATACTTAAAAAGT  
GAAATTAGGCATTAACCTGAGCAGCTGTTTTCCCACGCTAACTGTCTTTT  
CTTCACTGATGGTTGCTTCTTTTCAAATATATACGCTCATATTTGCTATA  
ACTTTGCATGAGCAAATCAAGTTGAGTGGAGAAAGAAATGGTGATCTCT  
TTTATAAGATATTGCCATAGTCACTCGTAATGTCTGCGCTCCATTGATAA

SNORD52A (SNORD202)

SNORD52B

SNORD52C

SNORD52D

TGCCTTTTTAAAGTCATGGTGTATGTGCTTAACTCTGAGTTGGTCTACTC  
 GAAGTTGATTGACCCAACCTCAGATCAGCTATTTCTGAAACCGAAAACCTCTG  
 AGTTTTTAATCTCTCGGTTAATCAACTCAGAGTTCAAGTTTAAACTCTGA  
 GTTGTGTTGAACCTCCTTACTGAAACAGGCCCCAGGTTGGATCAAAGAAAC  
 TGAGGCTGGTAGTTCGATGTCAACAGTTGACAATAAAATGGTAAGAATTGC  
 TTTTCCAATGGAAAAAAAAAATCAATTCAAAGAAAAGCACGTTGTCCCAGA  
 GTTTCATCTATGTTCCCTGGAGGACCACCTAACACTGCATTGTTTGAATG  
 ACCTCTTTGTCTGTCCACATCCATCACCAGTTTTTCAGTCACTGCTAATAA  
 GCTGATGATCTGAATACGTTGTGTTTGGTTAAGGAAACATGTAATAATGTG  
 CAGGGCTGGTGGTCCCTCAGGAAGTGGTTGAGAAAACCTGCTTTAGCCA  
 ATTATGATATAAATGATGAATCATTGACTAGAGTCTCTGATTTTCCCA  
TGAAGCTCTTACAGTGCACCTGAACGCATGCCGTACTGCTTATGGTGGAT SNORD52E  
TTATTTTTGGCTTAAATATTCCTAAATGTTAAAATACCTTCACAGGTTAG  
ATGAGTGAAATCAGTTGCCTTGTAGCAGATGCCATCTTTCAGCAAAAAA  
AGAGGTAATTACATAAAATGAAAGCCTTTTGTACATTATTGCATGTCATG SNORD52F  
ATGAACCATTTGACTAGAGTCTCTGATTTACCCATGAAGCTCTTCACAGT  
GCACTGAACACATGCTCTACAAAAAAATGAGTGGTTTGCTGTGGCTTAA  
ATGACCCGTAATGCTTAACTTTTCACAGTTTGGATGAGAAAAACAGAGGCT  
GCCAGGTAGCTGATGCCAACAATAGGCGACCAATGGGTAAGAATGGGTTT  
 TCGATAAAATCTTTCAAAGATAGCATTTTTTTCATTTATGCCATGTTATGAT SNORD52G  
GAATCTTTAGACTAGAGTCTCTGATTTACTTATGAAGCTGTTTCACAGTGC  
ACTGTACACATGCAATACAAAATAATGAGTGGTTTGTGTTACTTGAATG  
ATCCTGAATGCTTAAATAACTTTTCACAGTTTGGATCAAACCTGAAGCTGCT  
AGATAGCTGATGCCAACAATACACAGCCAATAGGTGAGAATGAGTTTAAAG  
 CAAAACTTTTTAAAGAAATGCCATGTTATGATGAATCTTTAGACTAGAGT SNORD52H  
CTCTGATTTCTCCATGAAGCTCTTCACAGTGCCTGAACACATGCAGTAC  
TGCTTAAGACTAATTTGAAGTGGCTTGAATGTTTCTAAAATGTAATAACT  
TTTATAGGTTGAATGGAACAAAAGCCTGCTGGCTGATTTCTAAGTTGACAT  
CCAATGGGTAAGAAGGATCGTCAATGAAAGCTTCACAAATAGGATAAAT  
 TTACACAGCAATTTTTTTATATATTTTTTTGTAGTTTTGCGCAATCTGAAAA  
 GTTTCACTTGTAAAAGTCAACACTGTCAAAAAGATCCTCATTCACAATTC  
 AGTGAAAAAGCTGAAATTGAGCATTTCAGACTGGTAGTTGGTTTTAAATG  
 TTGCACGTGAATTTTTTTTTTTCAAGCTTACACTCATCGTAACCATTATTT  
 CCAATAAATGATCTCTTGAATAGAAACGTATGTGAATTTTCAGGCCCA  
 AGTCACATGTAATGAACAAAAATATTTTTATTCATTTCAAAGCATT  
 GTCCATTAATGGTCAGTTGCAGGTAATGAGTATTCATAAAACTAGAGTTT  
 CTTTCTTTTCAAGGTTTTTCAACTACAGGGTTTGAAGCCAACATGGATGTC  
TTGGATTCATGAATCTGCTTAAAGGTTGGCGTTTTGACCTAACTGAGCTG SNORD52I (SNORD52)  
ATTCTCTATTGTGCAGTGATGATTCATAGACTAGAGTCTCTGATAACAA  
CATGAAGATCTACACATTTCTCTGAGCACAGCTTTTTTATTATGAGCATG  
TATTTGTTACTAAGAACTTTTGATTATTGGATTTATTTTTGTTTTTAGGT  
TGACGAGATGCCAGTGAAGGGGTGCTGCATACACATGAATGCCGAGCCGT  
 GTAATACTGGTTCAGTAAACCTAGCTCTTTTTCTTGTGTTAATGATGAC SNORDX  
TGCGTTTGTTCGGTTCCACTGAAAGTCAATGAAGTAACTTTCTCGCGGCG  
CACTGAAACACTGACAGACAATGCATGAACCTTTTATTTTCATGTCTTGTG  
TCTAATACAATTTTGTTTTCTTTCAAGGATGTGACCGAAGAGGAGCTGTG  
ACTGGTTTGTGTCACAAATGGTGAATTTAAAATGATATACATCAATTTAAAT  
GCTTGTTTAGTGGCATTCAATAGACTGTTTGGATTAAATTTTCTCATTTTC  
AGTTTTATAAACTGCTTTTTTCAACAGAGTATTGCTTTTTAATAAACATCAG  
AACTAAAGTGAAAAGTTGTCCATGTTTGTTTTTTGCATGAAATAAAAAATA  
TTGCGTATGGTTTTAACTTTTAGTCAATATAACATTCCTAGGCAGAAATT

Figure S9. *Danio rerio* FP101887. Exons (in blue) annotated by alignment with transcript FP101887.1-204. The sequences of the SNORDs are underlined from box C to box D (both included).
