# Supplementary material for: The shift from early to late types of ribosomes in zebrafish development involves changes at a subset of rRNA 2′-O-Me sites
Source: PubMed Central journal article supplement — RNA. 2020 Dec;26(12):1919–34. doi: 10.1261/rna.076760.120 (PMC7668251; doi:10.1261/rna.076760.120), 2020-12
Supplement: supp_076760.120_Supplemental_Material.pdf [file supp_076760.120_Supplemental_Material.pdf]

## Supplemental Material for

### **The shift from early to late types of ribosomes in zebrafish development involves changes at a subset of rRNA 2'-O-Me sites**

Sowmya Ramachandran, Nicolai Krogh, Tor Erik Jørgensen, Steinar Daae Johansen, Henrik Nielsen, and Igor Babiak.

The Supplemental Material contains:

Supplemental figure legends

Table S1

Table S2

Table S3

Table S4

Table S5

**Figure S1.** Examples of validation of rRNA ribose-methylated sites by primer extension. **(A)** Primer extension analysis using high and low dNTP concentrations addressing SSU-A1031 and SSU-U1045. **(B)** Same as in A but addressing SSU-A1637. **(C)** Same as in A but addressing LSU-U4272 and LSU-U4276. All primer extension results are summarized in **Table 1** and the oligos used are listed in **Table S5**. Note that sites are numbered according to human rRNA.

**Figure S2.** Heatmap and cluster analysis, and correlation between ribose methylated sites. **(A)** Heatmap and unsupervised cluster analysis of RiboMeth-seq scores (fraction methylated) from methylated positions in SSU, 5.8S, and LSU rRNA, respectively.

**Figure S3.** 2D structure of zebrafish early-SSU rRNA. Capital and black “M” represents 2’-O-Me sites conserved between zebrafish and human, capital and blue “M” represents 2’-O-Me sites novel to zebrafish.

**Figure S4.** 2D structure of zebrafish late-SSU rRNA. Capital and black “M” represents 2’-O-Me sites conserved between zebrafish and human, capital and blue “M” represents 2’-O-Me sites novel to zebrafish.

**Figure S5.** 2D structure of zebrafish early-LSU rRNA, 5.8S, and 5S. Capital and black “M” represents 2’-O-Me sites conserved between zebrafish and human, capital and blue “M” represents 2’-O-Me sites novel to zebrafish.

**Figure S6.** 2D structure of zebrafish late-LSU rRNA, 5.8S, and 5S. Capital and black “M” represents 2’-O-Me sites conserved between zebrafish and human, capital and blue “M” represents 2’-O-Me sites novel to zebrafish.

**Figure S7.** Drawings of SNORD-rRNA interactions. G-C and A-T pairs are indicated by a line, G-U pairs by a dot, and the methylated nucleotide by an “m” above the nucleotide. The sequence of the box D or D’ upstream of the antisense element is squared.

**Figure S8.** Compensatory base pair changes. All of the interactions between the SNORDs belonging to the minimal set and ribosomal RNA (see **Fig. S7**) were searched for compensatory base pair changes in comparisons between early- and late-rRNA from zebrafish and human rRNA. Nucleotides involved in compensatory changes or establishment of additional base pairing are labeled in green. Using the early-rRNA as reference, nucleotides that differ but maintain base pairing are labeled in yellow, and deviations that disrupt base pairing are in red.

**Figure S9.** *Danio rerio* FP101887. Exons (in blue) annotated by alignment with transcript FP101887.1-204. The sequences of the SNORDs are underlined from box C to box D (both included).

**Figure S10.** Potential to form terminal stems in SNORDs encoded by the FP101887 host gene. The canonical kink-turn in box C/D snoRNAs is shown with standard symbols for non-Watson-Crick base pairs and indication of the position of the terminal stem. Sequences of the proposed base pairings for all SNORDs in the host gene are shown in their transcriptional order.

**Table S1.** Sites with an RMS-score >0.75 in at least one sample but lacking further evidence from primer extension and/or SNORD finding.

| rRNA | Human  | Early | Late  | Primer extension |
|------|--------|-------|-------|------------------|
| 18S  | G721   | G769  | G733  | NA               |
| 18S  | U1045  | U1109 | U1066 | -                |
| 28S  | G1793  | G1387 | G1372 | -                |
| 28S  | G2690  | G2138 | G2122 | -                |
| 28S  | G2692  | G2140 | G2124 | -                |
| 28S  | G4065  | G3306 | G3200 | NA               |
| 28S  | Ψ4412* | U3710 | U3560 | NA               |
| 28S  | G4797  | G4041 | G3891 | -                |
| 5.8S | G134   | G137  | G135  | -                |

-: no primer extension signal detected, NA: not analyzed.

\*LSU:U4412 is a pseudouridine in human rRNA.

**Table S2.** List of methylated sites in zebrafish rRNA and conservation with human rRNA.

| SSU (18S rRNA) |       |      |              |       |       |       |              |
|----------------|-------|------|--------------|-------|-------|-------|--------------|
| Human          | Early | Late | Conservation | Human | Early | Late  | Conservation |
| A27            | A27   | A27  | x            | G601  | G647  | G611  | x            |
| A99            | A99   | A99  | x            | U627  | U673  | U637  | x            |
| U116           | U116  | U116 | x            | G644  | G690  | G654  | x            |
| U121           | U121  | U121 | x            | A668  | A714  | A678  | x            |
| A166           | A164  | A163 | x            | U799  | U853  | U815  | x            |
| U172           | U170  | U169 | x            | A1031 | A1095 | A1052 | x            |
| U286           | U333  | U296 | Z            | C1272 | C1339 | C1294 | x            |
| U287           | U334  | U297 | Z            | U1288 | U1355 | U1310 | x            |
| C346           | C392  | C356 | Z            | G1322 | G1389 | G1344 | Z            |
| U354           | U400  | U364 | x            | U1326 | U1393 | U1348 | x            |
| U428           | U474  | U438 | x            | G1328 | G1395 | G1350 | x            |
| G436           | G482  | G446 | x            | A1383 | A1450 | A1405 | x            |
| C462           | C508  | C472 | x            | U1442 | U1507 | U1461 | x            |
| A468           | A514  | A478 | x            | G1490 | G1555 | G1509 | x            |
| A484           | A530  | A494 | x            | A1637 | A1702 | A1656 | Z            |
| G509           | G555  | G519 | x            | A1678 | A1743 | A1697 | x            |
| A512           | A558  | A522 | x            | C1703 | C1768 | C1722 | x            |
| C517           | C563  | C527 | x            |       |       |       |              |
| LSU (28S rRNA) |       |      |              |       |       |       |              |
| Human          | Early | Late | Conservation | Human | Early | Late  | Conservation |
| A389           | A400  | A398 | x            | G3771 | G3052 | G2940 | x            |

|       |       |       |   |        |       |       |   |
|-------|-------|-------|---|--------|-------|-------|---|
| A391  | A402  | A400  | x | C3787  | C3068 | C2956 | x |
| G1303 | G925  | G913  | x | ψ3797* | U3078 | U2966 | x |
| A1310 | A932  | A920  | x | A3804  | A3085 | A2973 | x |
| A1313 | A935  | A923  | x | A3809  | A3090 | A2978 | x |
| G1509 | G1120 | G1109 | x | C3820  | C3101 | C2989 | x |
| A1511 | A1122 | A1111 | x | C3848  | C3129 | C3017 | x |
| A1521 | A1132 | A1121 | x | C3866  | C3147 | C3035 | x |
| G1612 | G1223 | G1212 | x | G3878  | G3159 | G3047 | x |
| A1858 | A1454 | A1437 | x | U3904  | U3185 | U3073 | x |
| C2338 | C1785 | C1770 | x | C3916  | C3197 | C3085 | Z |
| A2350 | A1797 | A1782 | x | G3923  | G3204 | G3092 | x |
| G2351 | G1798 | G1783 | x | C4032  | C3273 | C3167 | x |
| C2352 | C1799 | C1784 | x | G4166  | G3464 | G3314 | x |
| U2402 | U1849 | U1834 | x | U4197  | U3495 | U3345 | x |
| G2411 | G1858 | G1843 | x | G4198  | G3496 | G3346 | x |
| A2774 | A2222 | A2206 | x | U4272  | U3570 | U3420 | Z |
| C2791 | C2239 | C2223 | x | U4276  | U3574 | U3424 | x |
| A2802 | A2250 | A2234 | x | G4340  | G3638 | G3488 | x |
| G2817 | G2265 | G2249 | Z | G4362  | G3660 | G3510 | x |
| U2824 | G2272 | G2256 | x | C4426  | C3724 | C3574 | x |
| C2848 | C2297 | C2280 | x | G4464  | G3762 | G3612 | x |
| G2863 | G2312 | G2295 | x | U4468  | U3766 | U3616 | x |
| G3606 | G2887 | G2775 | x | G4469  | G3767 | G3617 | x |
| C3680 | C2961 | C2849 | x | A4493  | A3791 | A3641 | x |
| A3697 | A2978 | A2866 | x | C4506  | C3804 | C3654 | x |
| A3703 | A2984 | A2872 | x | A4560  | A3860 | A3709 | x |
| G3723 | G3004 | G2892 | x | U4590  | U3890 | U3739 | x |
| A3739 | A3020 | A2908 | x | G4593  | G3893 | G3742 | x |
| A3764 | A3045 | A2933 | x | C4983  | C4186 | C4022 | Z |

### 5.8S rRNA

| Human | Early | Late | Conservation |
|-------|-------|------|--------------|
| U8    | U8    | U8   | Z            |
| U14   | U14   | U14  | x            |
| G75   | G75   | G75  | x            |

x: Methylated sites conserved between zebrafish and human rRNA.

Z: novel methylation identified in zebrafish not found in human.

\*LSU:U3797 is a methylated pseudouridine (Ψm) in human rRNA.

**Table S3.** Novel zebrafish methylated sites not found in human rRNA.

| rRNA | Human | Early | Late  | rRNA | Human | Early | Late  |
|------|-------|-------|-------|------|-------|-------|-------|
| 18S  | U286  | U333  | U296  | 28S  | G2817 | G2265 | G2249 |
| 18S  | U287  | U334  | U297  | 28S  | C3916 | C3197 | C3085 |
| 18S  | C346  | C392  | C356  | 28S  | U4272 | U3570 | U3420 |
| 18S  | G1322 | G1389 | G1344 | 28S  | C4983 | C4186 | C4022 |
| 18S  | A1637 | A1702 | A1656 | 5.8S | U8    | U8    | U8    |

**Table S4.** Assigned SNORDs.

| <b>SSU (18S rRNA)</b> |                    |            |            |            |                    |
|-----------------------|--------------------|------------|------------|------------|--------------------|
| Nucleotide            | SNORD              | Nucleotide | SNORD      | Nucleotide | SNORD              |
| A27                   | SNORD27            | C462       | SNORD14    | C1272      | SNORD66            |
| A99                   | SNORD57            | A468       | SNORD83    | U1288      | SNORD110           |
| U116                  | SNORD42            | A484       | SNORD16    | G1322      | NA                 |
| U121                  | SNORD4             | G509       | SNORD11    | U1326      | SNORD33            |
| A166                  | SNORD44            | A512       | SNORD70    | G1328      | SNORD32            |
| U172                  | SNORD45            | C517       | SNORD56    | A1383      | SNORD30            |
| U286                  | NET1               | G601       | SNORD103   | U1442      | SNORD61            |
| U287                  | NET1 (+6 mod.)*    | U627       | SNORD65    | G1490      | SNORD25            |
| C346                  | SNORD200           | G644       | SNORD54    | A1637      | NA                 |
| U354                  | SNORD90            | A668       | SNORD36    | A1678      | SNORD82            |
| U428                  | SNORD68            | U799       | SNORD19    | C1703      | SNORD43            |
| G436                  | SNORD100           | A1031      | SNORD59A/B |            |                    |
| <b>LSU (28S rRNA)</b> |                    |            |            |            |                    |
| Nucleotide            | SNORD              | Nucleotide | SNORD      | Nucleotide | SNORD              |
| A389                  | SNORD26            | U2824      | SNORD34    | C3916      | SNORD202           |
| A391                  | SNORD81            | C2848      | SNORD50A   | G3923      | SNORD111           |
| G1303                 | SNORD21            | G2863      | SNORD50B   | C4032      | SNORD75            |
| A1310                 | SNORD126           | G3606      | SNORD201   | G4166      | SNORD31            |
| A1313                 | SNORD18            | C3680      | SNORD88    | U4197      | SNORD58            |
| G1509                 | SNORD2             | A3697      | SNORD37    | G4198      | SNORD58 (+6 mod.)* |
| A1511                 | SNORD51            | A3703      | SNORD36    | U4272      | SNORD203           |
| A1521                 | SNORD77            | G3723      | SNORD87    | U4276      | SNORD41            |
| G1612                 | SNORD80            | A3739      | SNORD46    | G4340      | SNORD60            |
| A1858                 | SNORD38            | A3764      | SNORD15    | G4362      | SNORD1             |
| C2338                 | SNORD24            | G3771      | SNORD15    | C4426      | SNORD49            |
| A2350                 | SNORD76            | C3787      | SNORD10    | G4464      | SNORD69            |
| G2351                 | SNORD76 (+6 mod.)* | ψ3797**    | SNORD17    | U4468      | Spb1 (yeast)***    |
| C2352                 | SNORD24            | A3804      | SNORD30    | G4469      | Spb1 (yeast)***    |

|       |          |       |            |       |          |
|-------|----------|-------|------------|-------|----------|
| U2402 | SNORD143 | A3809 | SNORD79    | A4493 | SNORD29  |
| G2411 | SNORD6   | C3820 | SNORD74    | C4506 | SNORD35  |
| A2774 | SNORD99  | C3848 | SNORD53A/B | A4560 | SNORD119 |
| C2791 | SNORD55  | C3866 | SNORD47    | U4590 | SNORD72  |
| A2802 | SNORD95  | G3878 | SNORD12    | G4593 | SNORD78  |
| G2817 | NA       | U3904 | SNORD52    | C4983 | NET3     |

### 5.8S rRNA

|            |          |            |         |            |         |
|------------|----------|------------|---------|------------|---------|
| Nucleotide | SNORD    | Nucleotide | SNORD   | Nucleotide | SNORD   |
| U8         | SNORD204 | U14        | SNORD71 | G75        | SNORD96 |

mod.: modification, NA: No assigned SNORD.

\* Assumed to be +6 modifications.

\*\* LSU:U3797 is a methylated pseudouridine ( $\Psi$ m) in human rRNA.

\*\*\* Assumed to be introduced by Spb1-homolog.

**Table S5.** List of DNA oligos.

| Primer extension analysis |                       |             |                    |                   |
|---------------------------|-----------------------|-------------|--------------------|-------------------|
| Name                      | Sequence              | Description | Pos. 3'end (early) | Pos. 3'end (late) |
| C1594                     | GCAGACATTCGAATGAATCGT | px 1.1      | -                  | 346 (SSU)         |
| C1595                     | ATCGGCCCGAGGTTA       | px 1.2      | 347 (SSU)          | 310 (SSU)         |
| C1596                     | ACCATGGTAGGCGCCTAA    | px 2.1      | -                  | 389 (SSU)         |
| C1597                     | TACCGGACACCCAGCTAA    | px 3.1      | -                  | 780 (SSU)         |
| C1598                     | CATCGTTTACGGTCGGAA    | px 4.1      | 1136 (SSU)         | 1093 (SSU)        |
| C1599                     | CAAATCGCTCCACCACTAA   | px 5.1      | -                  | 1364 (SSU)        |
| C1600                     | GACTTAATCAACGCAAGCTTA | px 6.1      | -                  | 1681 (SSU)        |
| C1601                     | ACTGGGCGTCTCGCATT     | px 7.1      | -                  | 1403 (LSU)        |
| C1602                     | GCCAGTTCTGCTTACCAA    | px 7.2      | -                  | 1428 (LSU)        |
| C1603                     | AGGGCCGACGAGAGCTCA    | px 8.1      | 2158 (LSU)         | 2142 (LSU)        |
| C1604                     | TTCTCCCCGGATTTTCAA    | px 8.2      | 2175 (LSU)         | 2159 (LSU)        |
| C1605                     | CGAAGTTACGGATCTGACTT  | px 9.1      | 2293 (LSU)         | 2276 (LSU)        |
| C1606                     | ACTTGCCGACTTCCCTTA    | px 9.2      | 2279 (LSU)         | 2262 (LSU)        |
| C1607                     | GGGCCTCCCACTTATTCT    | px 10.1     | 3220 (LSU)         | 3108 (LSU)        |
| C1608                     | CCCAGGGCCTCCCACTT     | px 10.2     | -                  | 3113 (LSU)        |
| C1609                     | GCTTGACGCCAGAAGCA     | px 11.1     | 3343 (LSU)         | 3228 (LSU)        |
| C1610                     | CGTGAGGCCCGCTTTCA     | px 12.1     | -                  | 3439 (LSU)        |
| C1611                     | AAGCCAGAAGGATCGTGA    | px 12.2     | -                  | 3452 (LSU)        |
| C1612                     | GATCGTGAGGCCCGCTT     | px 12.3     | 3529 (LSU)         | 3442 (LSU)        |
| C1613                     | TCCCGTCACGGCTGGCTCT   | px 13.1     | -                  | 3915 (LSU)        |
| C1614                     | CCGGTTCCTGTACGAAT     | px 13.3     | 4079 (LSU)         | -                 |
| C1615                     | CTCTGCCACGCACGAAA     | px 14.1     | -                  | 4039 (LSU)        |

|       |                         |             |            |            |
|-------|-------------------------|-------------|------------|------------|
| C1616 | CAGCGATGGAGCTGCTCTG     | px 14.2     | -          | 4051 (LSU) |
| C1617 | GCAGCTAGCTGCGTTCTT      | px 15.1     | 40 (5.8S)  | 40 (5.8S)  |
| C1618 | GGCGACGCTCAGACA         | px 16.1     | -          | 143 (5.8S) |
| C1666 | AATCGAGAAAGAGCTATCAAT   | px 19.1     | -          | 1317 (SSU) |
| C1623 | AGATCCAAAACCCATCCGGGTG  | seq-temp Fo | -          | 248 (SSU)  |
| C1624 | GTAATTCCAGCTCCAATAGCG   | seq-temp Fo | 692 (SSU)  | 659 (SSU)  |
| C1625 | ATGGAATAGGACTCCGGTTC    | seq-temp Fo | -          | 904 (SSU)  |
| C1626 | ATGGGCGGATCAACGTGTGC    | seq-temp Fo | 1618 (SSU) | 1572 (SSU) |
| C1627 | TGTGTACAAAGGGCAGGGAC    | seq-temp Re | 1745 (SSU) | 1699 (SSU) |
| C1628 | ACGTGCAAATCGGTCGTCGAC   | seq-temp Fo | 1212 (LSU) | 1201 (LSU) |
| C1629 | GGTCTGATGAGCGTCGGCATC   | seq-temp Re | 1499 (LSU) | 1482 (LSU) |
| C1630 | GCAGATCTTGGTGGTAGTAGC   | seq-temp Fo | 1799 (LSU) | 1784 (LSU) |
| C1631 | CCGAAGTTACGGATCTGACTTGC | seq-temp Re | 2291 (LSU) | 2274 (LSU) |
| C1632 | GGATGAACGAGATCCCCTGTC   | seq-temp Fo | 3101(LSU)  | 2989 (LSU) |
| C1633 | AGCCAGTTATCCCTGTGGTAAC  | seq-temp Re | 3650 (LSU) | 3500 (LSU) |
| C1634 | GGTGCGAAGCTACCATCTGTG   | seq-temp Fo | -          | 3797 (LSU) |
| C1635 | CAACTCTTAGCGGTGGATCACTC | seq-temp Fo | 23 (5.8S)  | 23 (5.8S)  |
| C1636 | CGACGCTCAGACAGGCGT      | seq-temp Re | -          | 138 (5.8S) |

Pos: position of the 3' end of the oligo in early and late rRNA, seq-temp: oligo used for PCR to generate sequencing ladder.
