# Supplementary figures and images for: The shift from early to late types of ribosomes in zebrafish development involves changes at a subset of rRNA 2′-O-Me sites
Source: PubMed Central journal article supplement — RNA. 2020 Dec;26(12):1919–34. doi: 10.1261/rna.076760.120 (PMC7668251; doi:10.1261/rna.076760.120), 2020-12

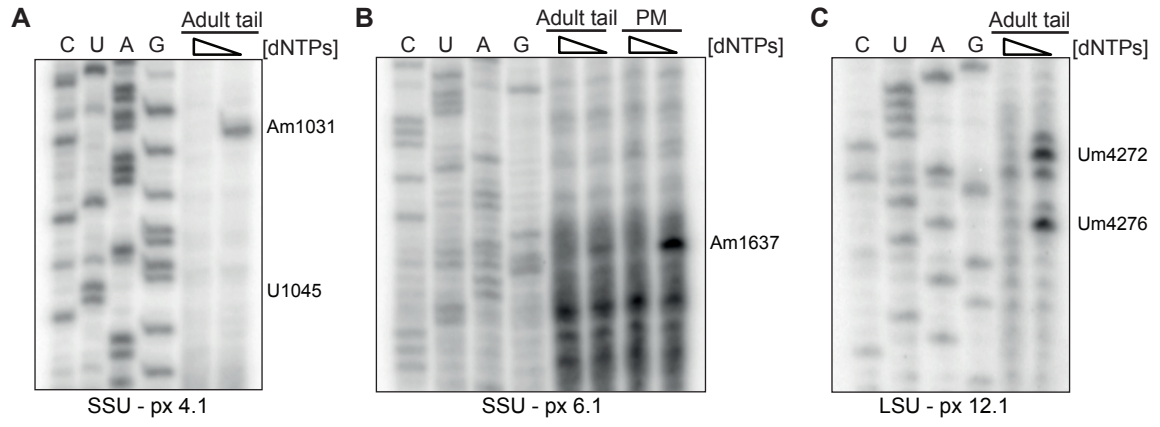

Figure S1

Supplement: supp_076760.120_Supplemental_Figure_S1.pdf [file supp_076760.120_Supplemental_Figure_S1.pdf]

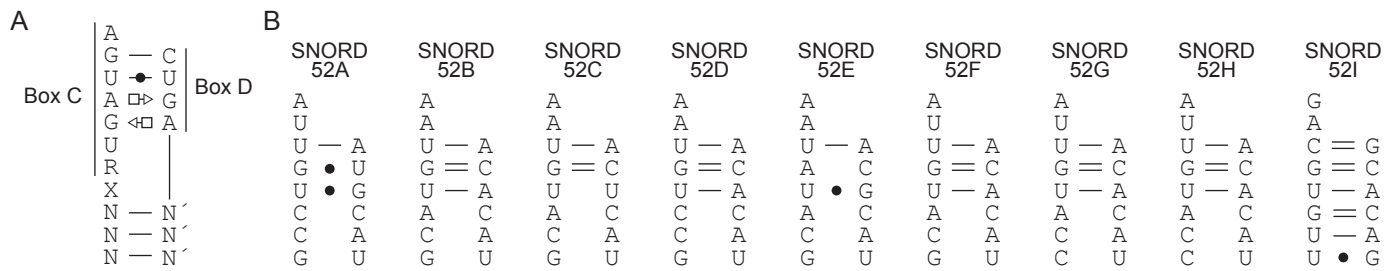

**Figure S10**

Supplement: supp_076760.120_Supplemental_Figure_S10.pdf [file supp_076760.120_Supplemental_Figure_S10.pdf]

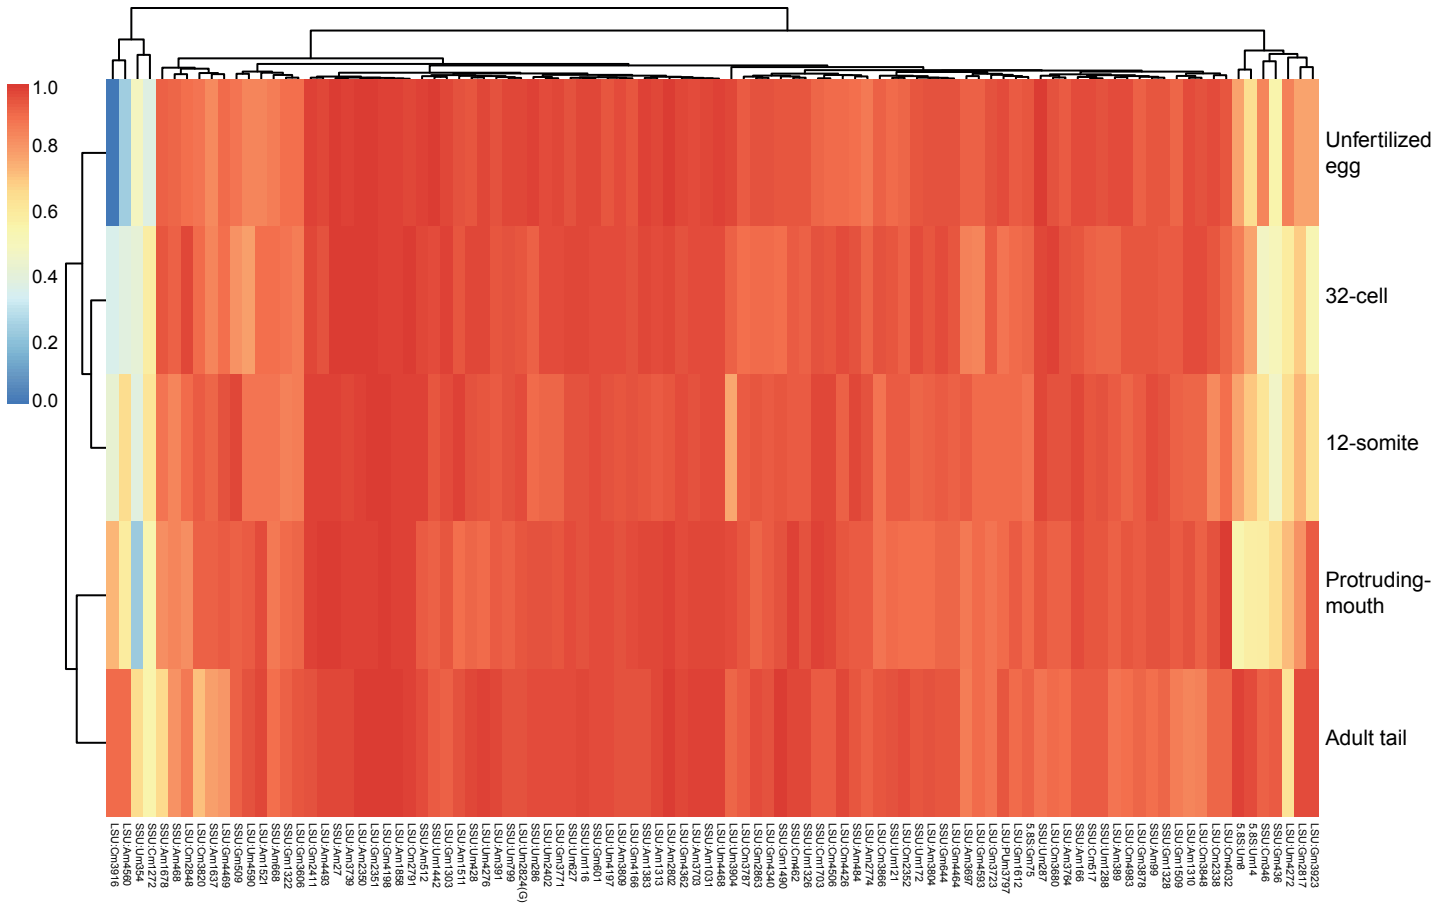

Figure S2

Supplement: supp_076760.120_Supplemental_Figure_S2.pdf [file supp_076760.120_Supplemental_Figure_S2.pdf]

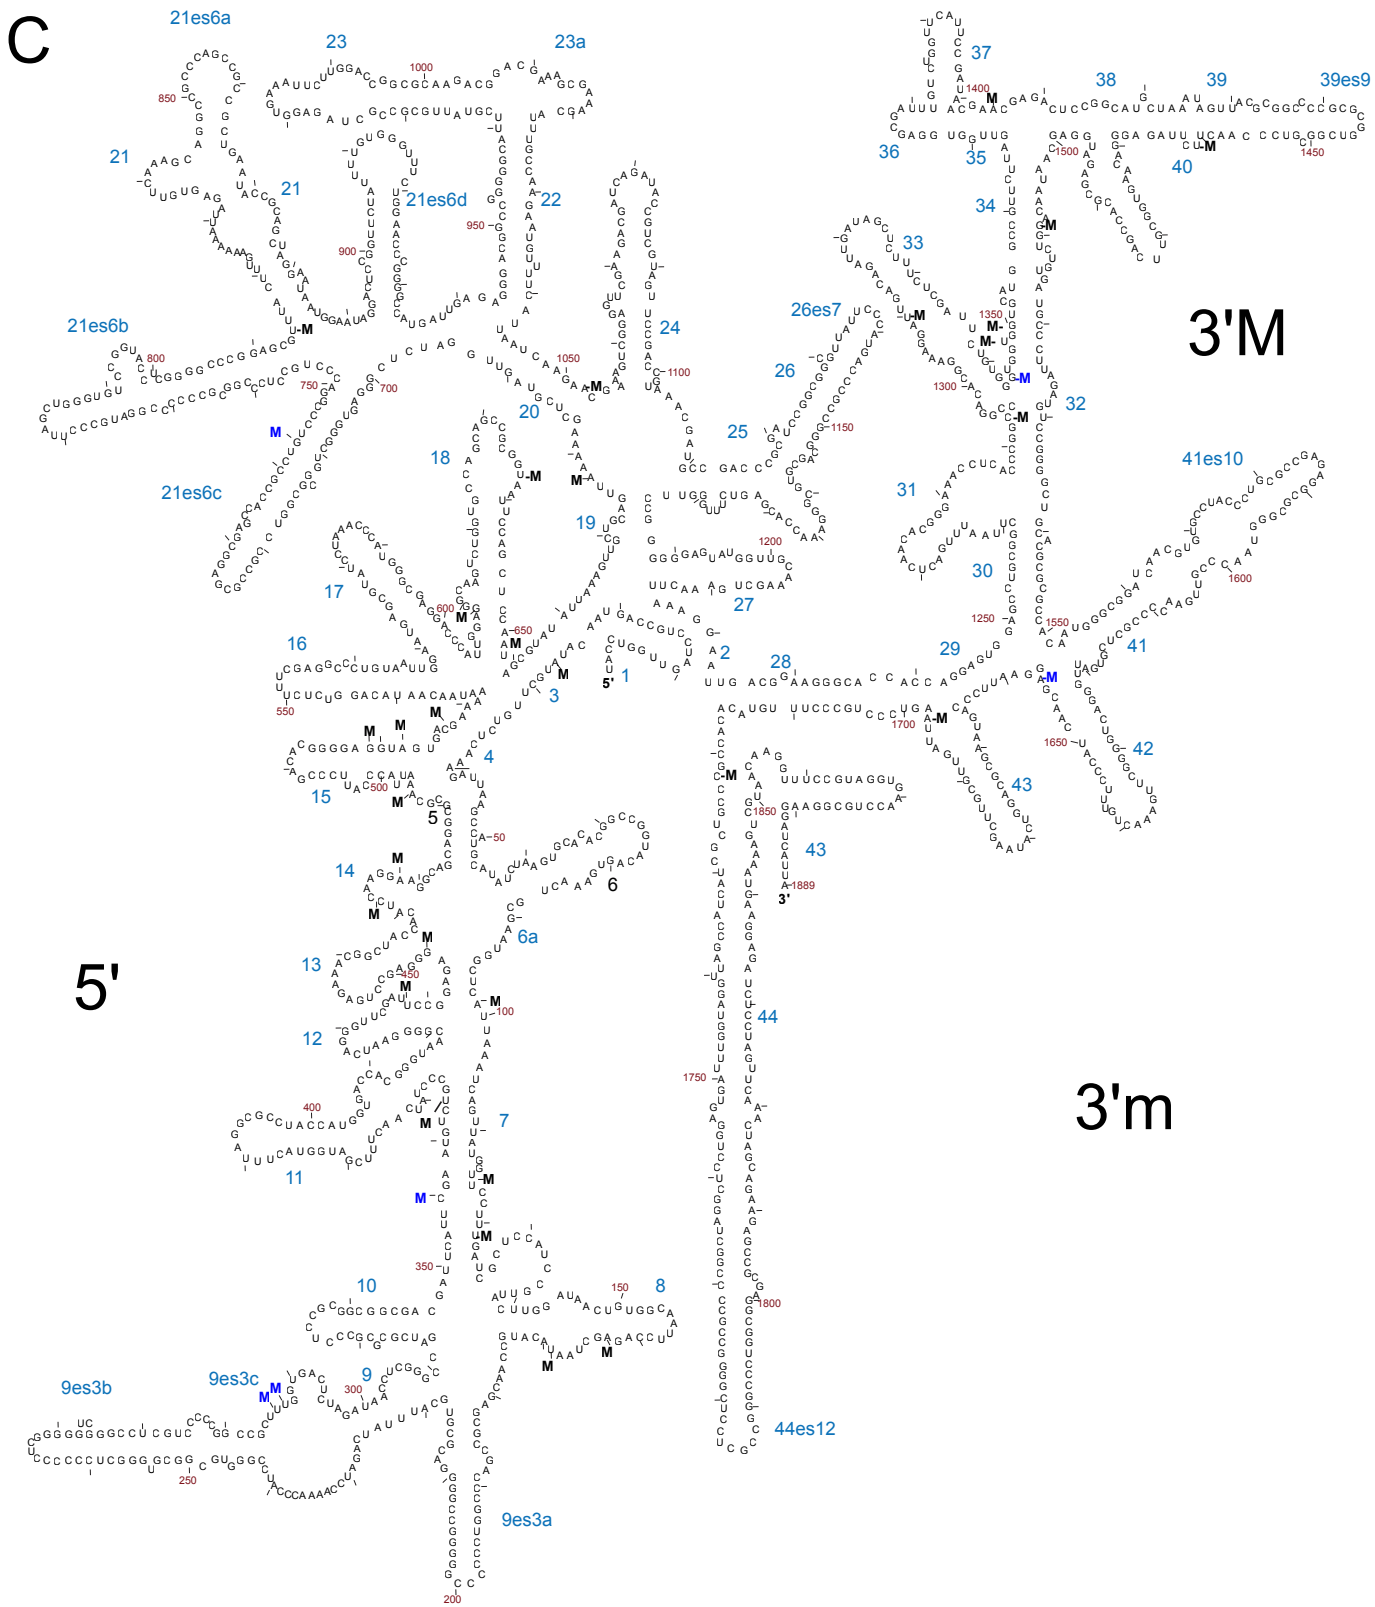

**Danio rerio**  
late embryonic small subunit ribosomal RNA

**Figure S4**

Supplement: supp_076760.120_Supplemental_Figure_S4.pdf [file supp_076760.120_Supplemental_Figure_S4.pdf]

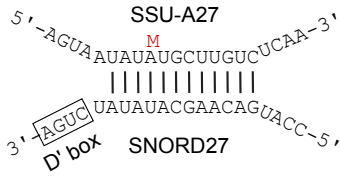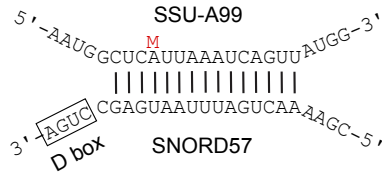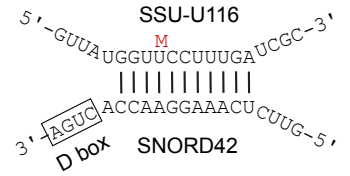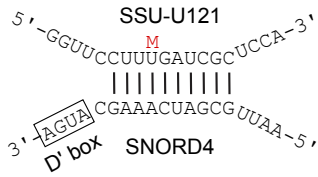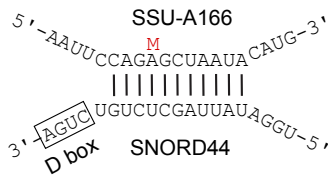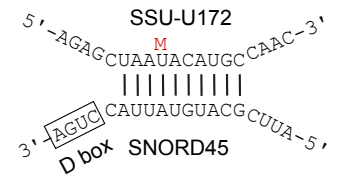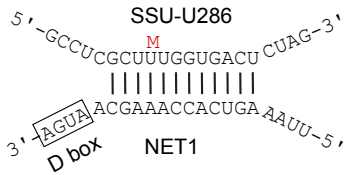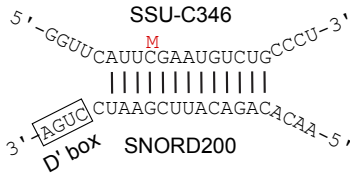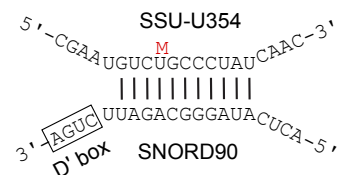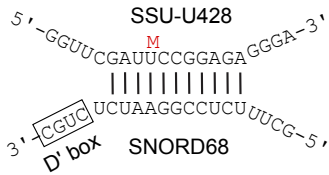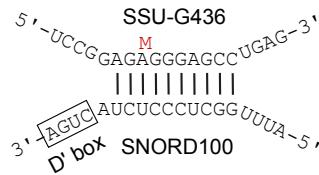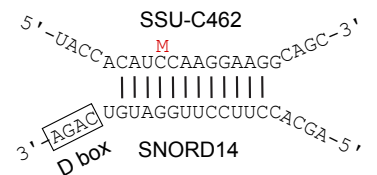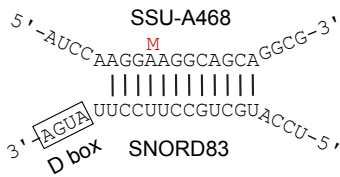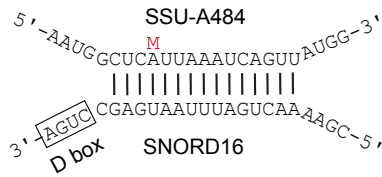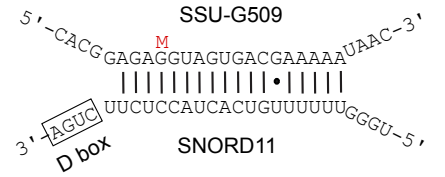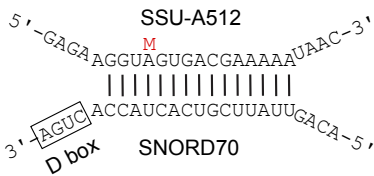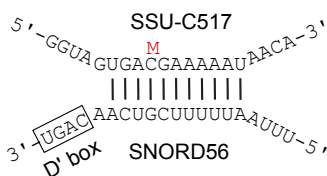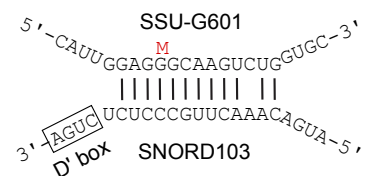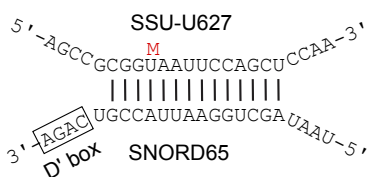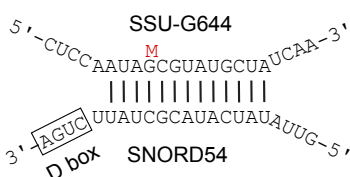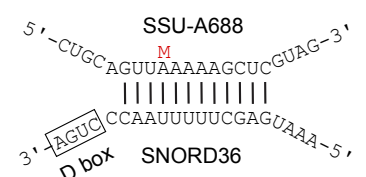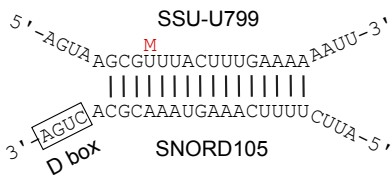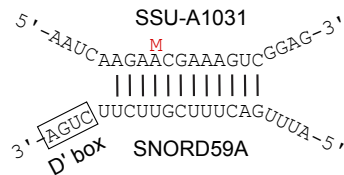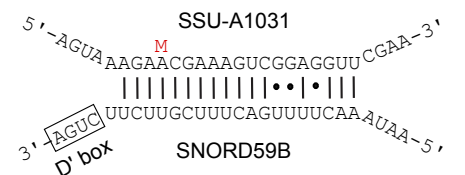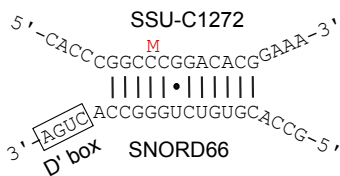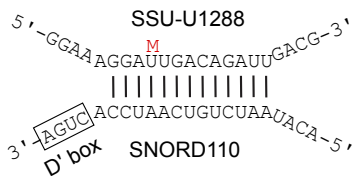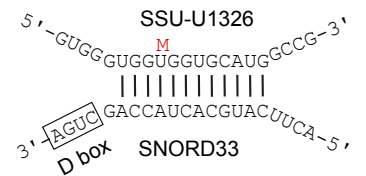

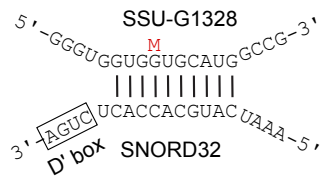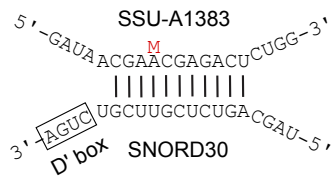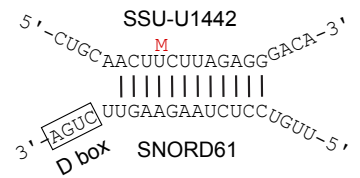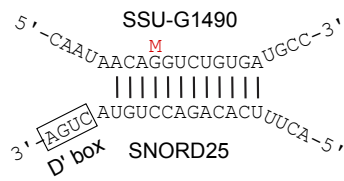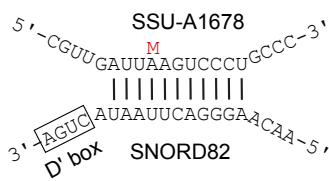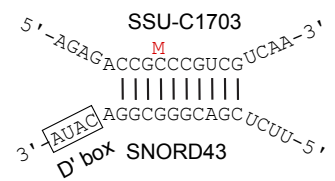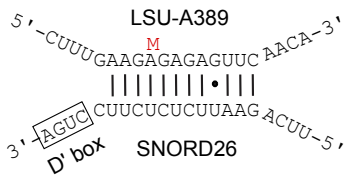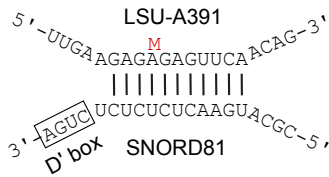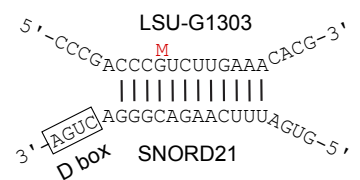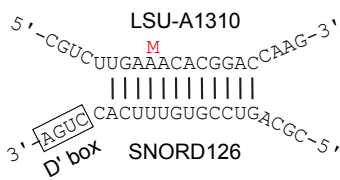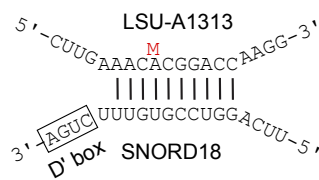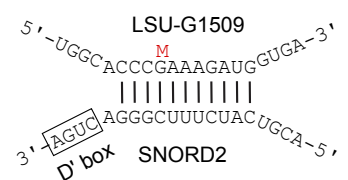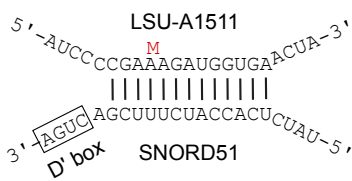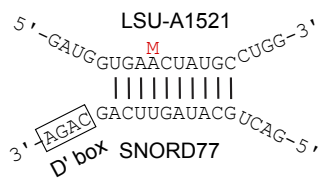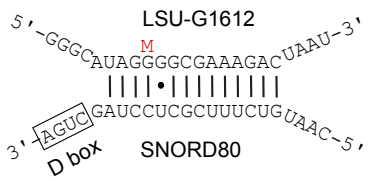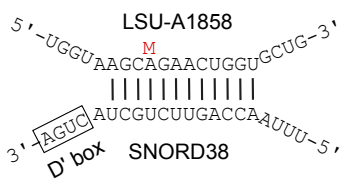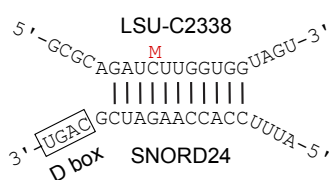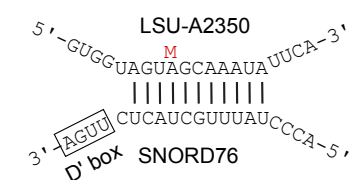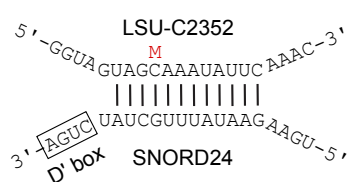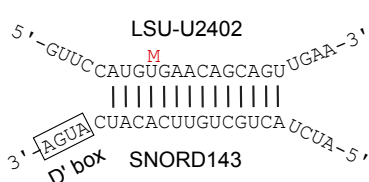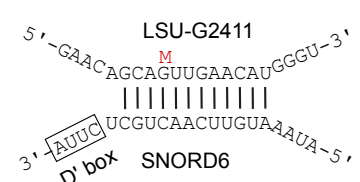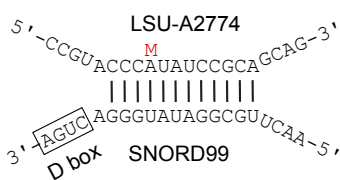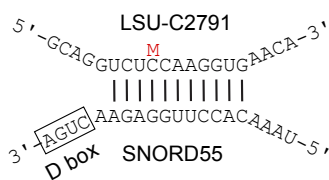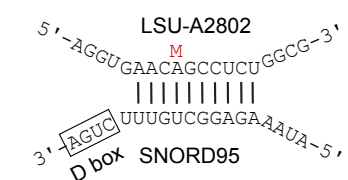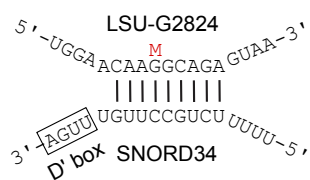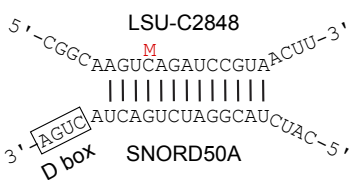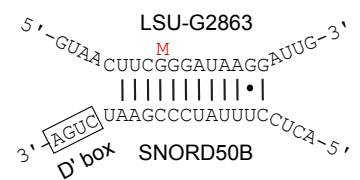

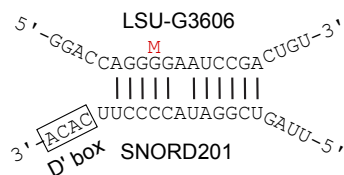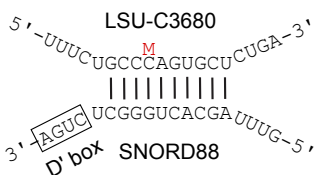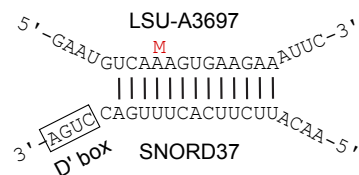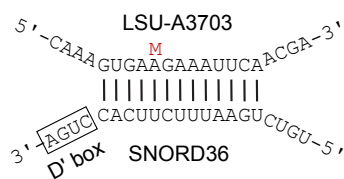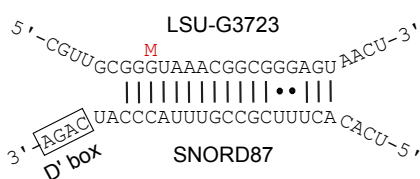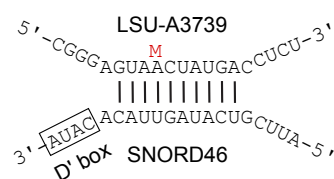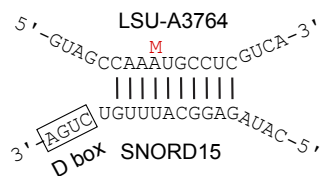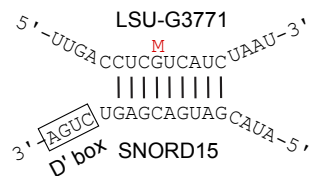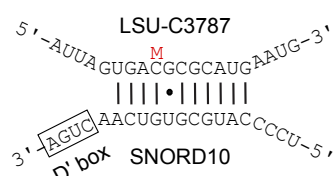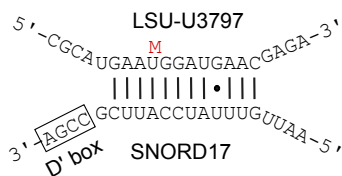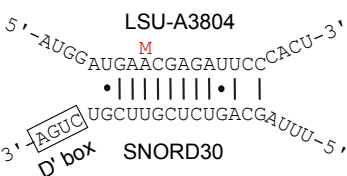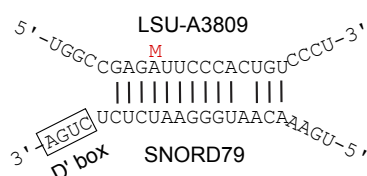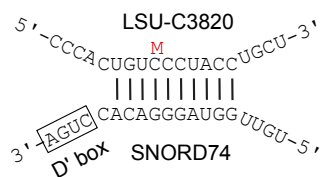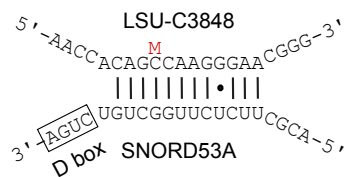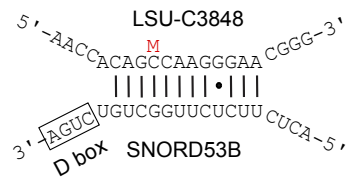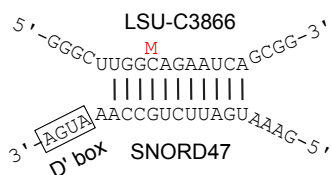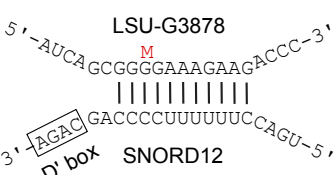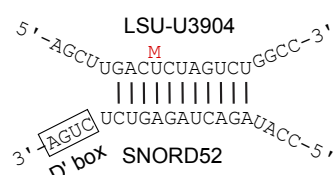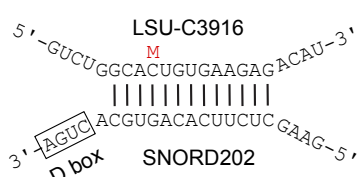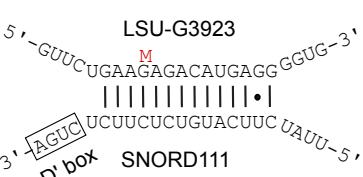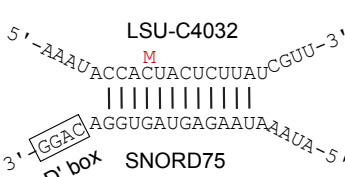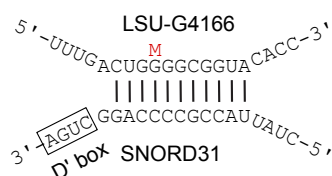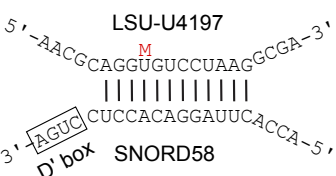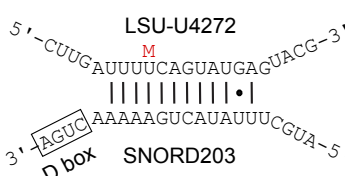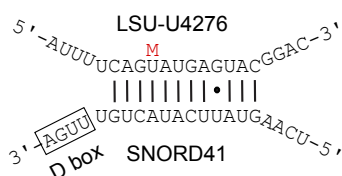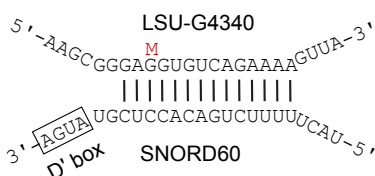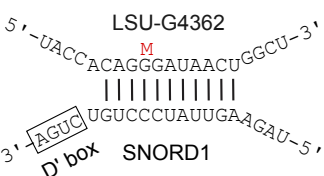

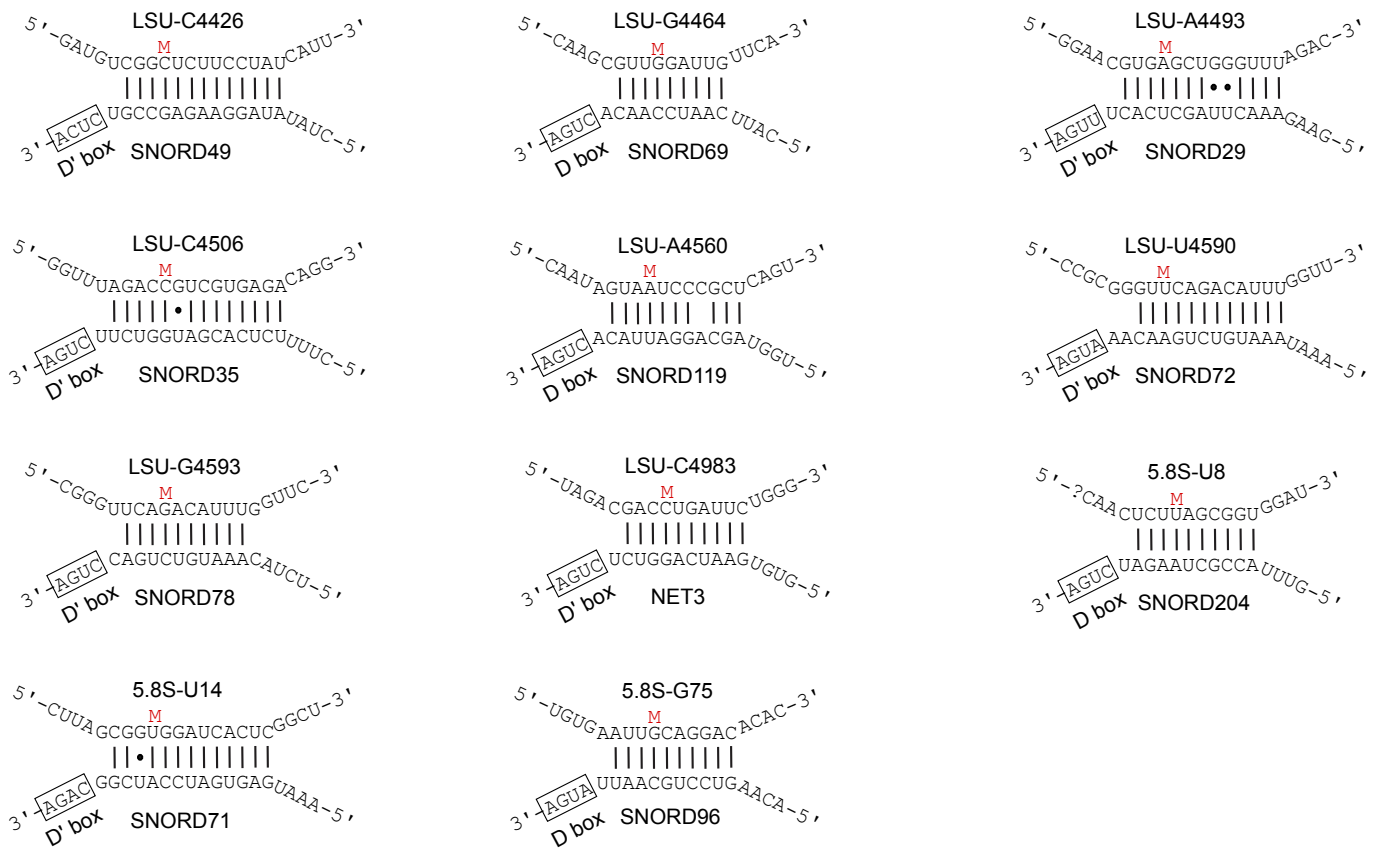

Figure S7

Supplement: supp_076760.120_Supplemental_Figure_S7.pdf [file supp_076760.120_Supplemental_Figure_S7.pdf]
